# Supplementary material for: Crystal structure of DnaT84–153-dT10 ssDNA complex reveals a novel single-stranded DNA binding mode
Source: PubMed Central journal article supplement (PMC4132743; doi:10.1093/nar/gku633), 2014-07-22

Table S1. DNA substrates used for studies.

| <b>Name</b>             | <b>Sequence</b>                                   | <b>Study</b> |
|-------------------------|---------------------------------------------------|--------------|
| dT10                    | 5' - TTTTTTTTTT - 3'                              | EMSA         |
| dT15                    | 5' - TTTTTTTTTTTTTTTT -3'                         | X-ray        |
| dT30                    | 5' - TTTTTTTTTTTTTTTTTTTTTTTTTTTTTTTTTT -3'       | EMSA         |
| 5F-dT15                 | 5' - FAM - TTTTTTTTTTTTTTTT -3'                   | FPA          |
| 5F-dA15                 | 5' - FAM - AAAAAAAAAAAAAAAAAA -3'                 | FPA          |
| 5F-dT30                 | 5' - FAM - TTTTTTTTTTTTTTTTTTTTTTTTTTTTTTTTTT -3' | FPA          |
| 5F-dA30                 | 5' - FAM - AAAAAAAAAAAAAAAAAAAAAAAAAAAAAAAAAA -3' | FPA          |
| 5F-dC30                 | 5' - FAM - CCCCCCCCCCCCCCCCCCCCCCCCCCCCCCCC - 3'  | FPA          |
| 5F-d(CA) <sub>15</sub>  | 5' - FAM - CACACACACACACACACACACACACACACA -3'     | FPA          |
| 5F-d(TG) <sub>15</sub>  | 5' - FAM - TGTGTGTGTGTGTGTGTGTGTGTGTGTGTG -3'     | FPA          |
| 5F-d(TGG) <sub>10</sub> | 5' - FAM - TGGTGGTGGTGGTGGTGGTGGTGGTGGTGG -3'     | FPA          |
| 5F-d(TGGG) <sub>7</sub> | 5' - FAM - TGGGTGGGTGGGTGGGTGGGTGGGTGGG -3'       | FPA          |

Table S2 Data collection and refinement statistics.

|                                    |                                                   | DnaT <sup>84-153</sup> -dT10 <sup>a</sup> |
|------------------------------------|---------------------------------------------------|-------------------------------------------|
| <b>Data collection</b>             |                                                   |                                           |
| Wavelength(Å)                      |                                                   | 0.97930                                   |
| Space group                        |                                                   | P 1                                       |
| Cell dimensions                    | <input type="checkbox"/> <input type="checkbox"/> |                                           |
| <i>a</i> , <i>b</i> , <i>c</i> (Å) |                                                   | 47.14, 47.42, 54.14                       |
| <i>α</i> , <i>β</i> , <i>γ</i> (°) |                                                   | 88.34, 86.25, 71.24                       |
| Resolution (Å)                     |                                                   | 27.54 - 1.96<br>(2.03 -1.96) <sup>b</sup> |
| Unique reflections                 |                                                   | 30764 (2970)                              |
| Rmerge (%)                         |                                                   | 0.092(0.301)                              |
| I/σI                               |                                                   | 14.7(7.7)                                 |
| Completeness (%)                   |                                                   | 97.1(96.6)                                |
| Redundancy                         |                                                   | 3.8                                       |
| <b>Refinement</b>                  |                                                   |                                           |
| Rwork / Rfree                      |                                                   | 0.189 /0.229                              |
| Total No. atoms                    |                                                   | 3372                                      |
| Residues                           |                                                   | 359                                       |
| dT10                               |                                                   | 1                                         |
| Waters                             |                                                   | 257                                       |
| Mean B-factors                     |                                                   | 42.75                                     |
| <b>R.m.s deviations</b>            |                                                   |                                           |
| Bond lengths (Å)                   |                                                   | 0.0093                                    |
| Bond angles (°)                    |                                                   | 1.2086                                    |
| Most favored                       |                                                   | 99.4                                      |
| Additional allowed                 |                                                   | 0.6                                       |
| Disallowed regions                 |                                                   | 0                                         |

<sup>a</sup> dT10 is short for the dT10 ssDNA.

<sup>b</sup> Values in parentheses are for highest-resolution shell.

Table S3. Structural comparisons of DnaT with structurally similar proteins using DALI.

| Protein                                | PDB ID | Z-score | RMSD | Sequence identity (%) | Number of C $\alpha$ atoms superimposed |
|----------------------------------------|--------|---------|------|-----------------------|-----------------------------------------|
| RMI1                                   | 4CHT   | 4.3     | 3.0  | 7                     | 58                                      |
| RMI1                                   | 4CGY   | 3.7     | 3.0  | 10                    | 58                                      |
| Probable RNA polymerase sigma-C factor | 2O7G   | 3.5     | 3.1  | 13                    | 64                                      |
| Retinoblastoma-associated protein      | 4ELJ   | 3.4     | 3.0  | 8                     | 49                                      |
| Amylosucrase                           | 1MW0   | 3.3     | 3.6  | 9                     | 56                                      |
| Amylosucrase                           | 1MW1   | 3.3     | 3.6  | 9                     | 56                                      |
| Neurocalcin-delta                      | 1BJF   | 3.2     | 3.4  | 10                    | 50                                      |
| RNA polymerase sigma factor            | 1H3L   | 3.2     | 3.1  | 11                    | 56                                      |
| RNA polymerase sigma factor            | 4LUP   | 3.1     | 3.3  | 8                     | 63                                      |
| ATP-dependent protease Lon             | 3KLJ   | 3.1     | 3.3  | 10                    | 62                                      |
| Rap1A protein                          | 3ZFI   | 3.0     | 3.2  | 2                     | 63                                      |
| Rap1A                                  | 4BI8   | 2.9     | 3.2  | 2                     | 63                                      |
| Uncharacterized protein YmgD           | 2LRM   | 2.9     | 3.0  | 10                    | 60                                      |
| Protein SifA                           | 3HW2   | 2.9     | 3.0  | 6                     | 51                                      |
| RNA polymerase sigma factor            | 2MAP   | 2.9     | 3.3  | 8                     | 63                                      |
| Phosphoribosylformylglycinamide        | 4LGY   | 2.9     | 2.8  | 11                    | 45                                      |
| RNA polymerase sigma-E factor          | 1OR7   | 2.9     | 3.4  | 8                     | 64                                      |
| Uncharacterized protein YmgD           | 2LRY   | 2.9     | 3.0  | 8                     | 62                                      |
| L-seryl-tRNA(SEC) selenium transferase | 3WLH   | 2.9     | 2.9  | 10                    | 50                                      |
| L-seryl-tRNA(SEC) selenium transferase | 3WLK   | 2.9     | 2.9  | 10                    | 51                                      |

## SUPPLEMENTARY MATERIALS.

### Figure S1

Four-step processes of DnaT crystals. (A) Crystals first appeared as fine needles in 3-4 days; these needles were too small to diffract well. (B) Some of the crystals became small sticks, which were large enough to diffract well for data collection after 1-2 weeks. (C) Crystals cracked after 2-3 weeks. (D) All of the crystals disappeared after 3-4 weeks.

### Figure S2

SDS-PAGE and mass spectra assays of the different samples. (A) Coomassie Blue-stained 12% SDS-PAGE of the purified DnaT. (B) Coomassie Blue-stained 16% SDS-PAGE of the precipitate droplets and crystal droplets. The stars represent the bands that were used for the mass spectra assays. (C) Mass spectra results of the gels for Band1, Band2, and Band3. The mass spectra results of two bands from the precipitate droplets were the same as the crystal droplets (data not shown).

### Figure S3

The 2Fo-Fc electron density of dT10 ssDNA contoured at 1.0- $\sigma$ . (A) The 2Fo-Fc electron density of ssDNA in the 1.96 Å DnaT<sup>84-153</sup>-dT10 complex structure. (B) The 2Fo-Fc electron density of ssDNA in the 2.83 Å DnaT<sup>84-153</sup>-dT10 complex structure.

### Figure S4

Structure superimpositions between the the N terminal of RMI1 and DnaT<sup>84-153</sup>. The N terminal of RMI1 (from Asn<sup>2</sup> to Arg<sup>62</sup>) is shown in light blue, while DnaT<sup>84-153</sup> is shown in yellow.

### Figure S5

Structural comparisons and EMSA assays. (A) EMSA result of dT10 ssDNA to full length DnaT. The stars represent the band position of the DnaT-dT10 ssDNA complex. (B) FPAs of DnaT with different types of 5'-FAM-labelled ssDNA substrates. The data of dA15 and dT15 were fitted according to the equation (see Methods). Error bars represent the standard deviation of three independent measurements. (C) Size exclusion chromatography analysis of the DnaT and its mutants. The assembly of DnaT and site-directed mutant Y127A, W128A, Y127A/W128A, K133A, F135A, K143A, and R146A proteins were determined using a Superdex 200 column (10/300 GL) (GE Healthcare). The dashed lines indicate the elution positions of the standard proteins. (D) Gel-filtration analysis of DnaT<sup>84-179</sup> and DnaT<sup>84-153</sup> performed on a Superdex 75 column (10/300 GL) (GE Healthcare). The theoretical molecular weights of the DnaT<sup>84-179</sup> dimer and DnaT<sup>84-153</sup> dimer in solution (buffer A) are 20 kDa and 14 kDa. The column was calibrated with proteins of known molecular masses (see Methods).

#### Figure S6

Negative staining EM results of different samples. (A) EM result of phiX174 ssDNA. (B-C) EM results of DnaT or DNase I pretreated DnaT. (D) EM result of DnaT-dT50 ssDNA complex. According to the proposed model in the Fig 6B-D, the length of DnaT bound dT50 ssDNA is about 30nm. The length of the particle could be estimated based on the green and red ruler. (E-F) DnaT-phiX174 ssDNA filaments observed by negative staining EM.

#### Figure S7

Negative staining EM results and two models. (A-B) EM results of dT50 ssDNA control and DnaT<sup>84-179</sup> control. (C) No visible filament of DnaT<sup>84-179</sup>-phiX174 ssDNA filament could be observed by negative staining EM in the experimental condition. (D) The model illustrates dimeric DnaT<sup>84-179</sup> bind to ssDNA randomly. The elements used in the model are similar to Fig 6D. (E) Oligomerized DnaTs bind to ssDNA with higher cooperative effect to form a filament.

A

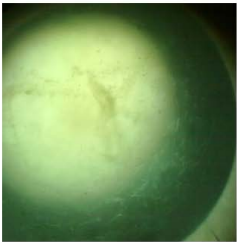

B

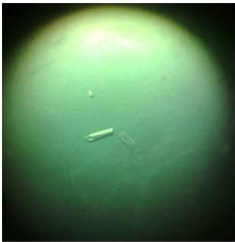

C

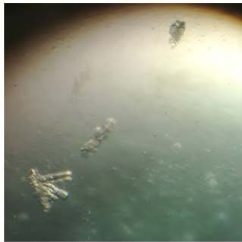

D

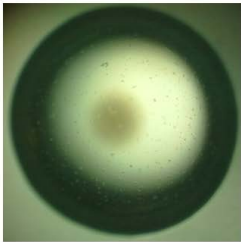

A

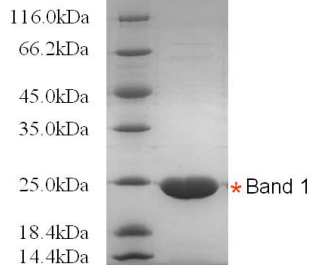

B

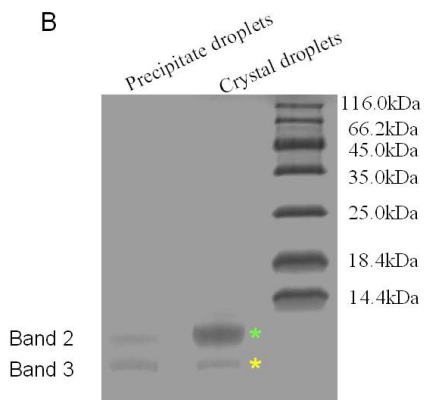

C

Band 1

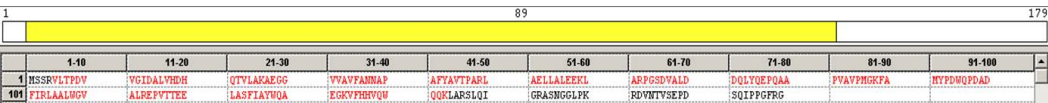

Band 2

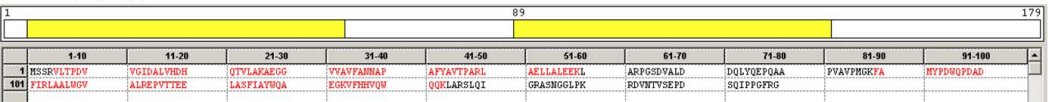

Band 3

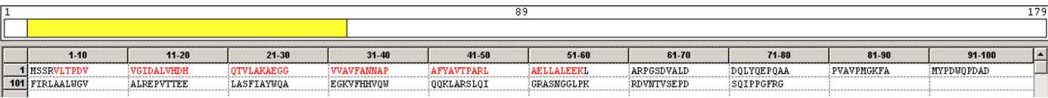

A

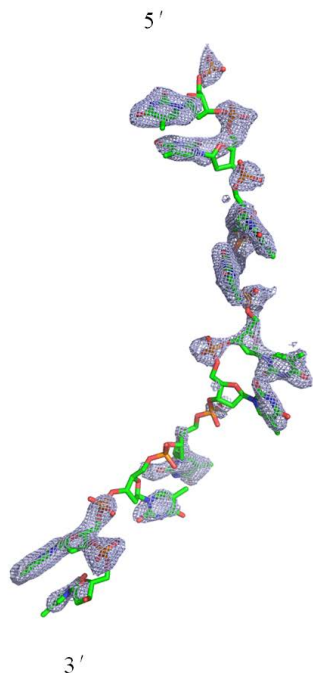

B

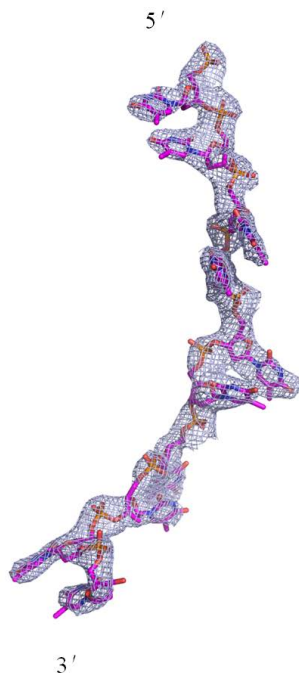



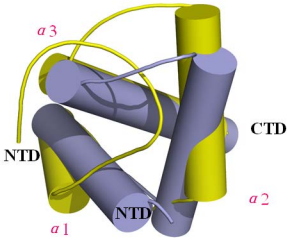

A

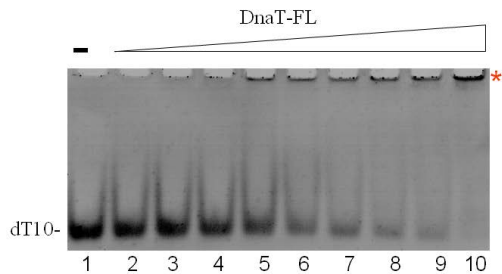

B

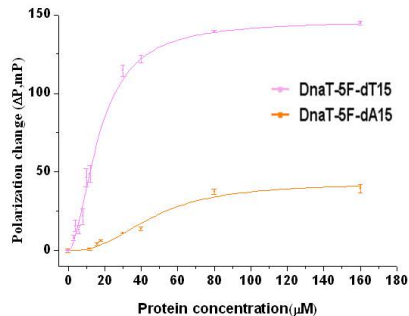

C

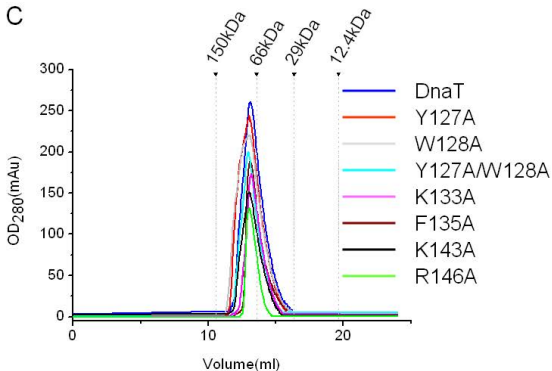

D

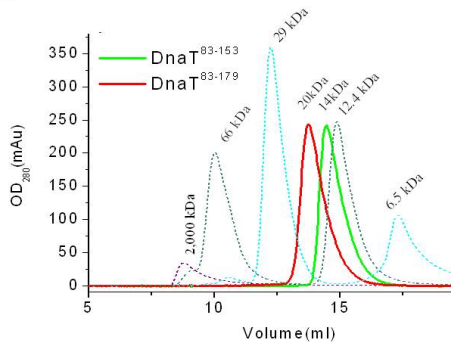

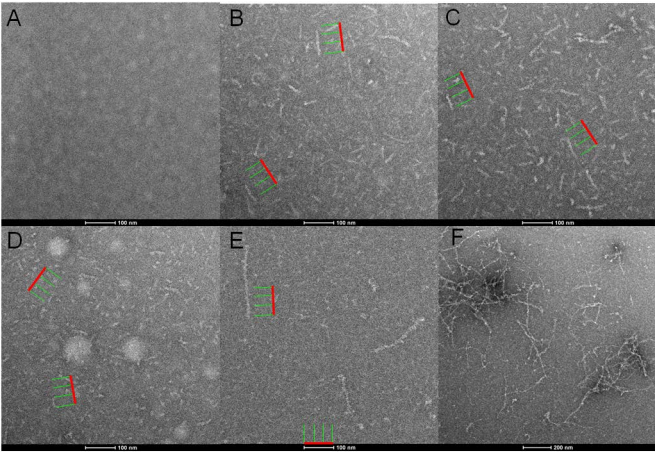

A

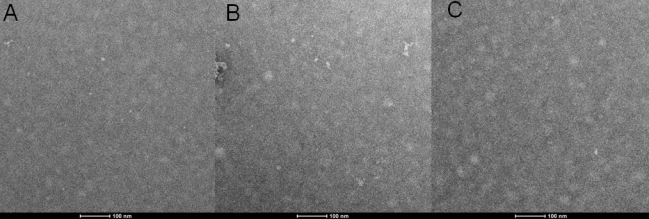

B

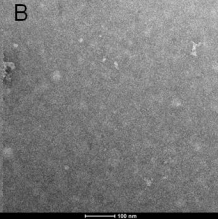

C

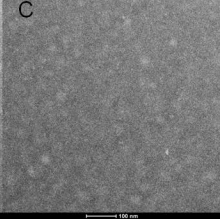

D

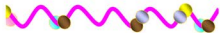

E

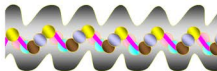

Supplement: supp_gku633_nar-01027-z-2014-File011.pdf [file supp_gku633_nar-01027-z-2014-File011.pdf]
